# Supplementary material for: Synthesis of a potassium capped terminal cobalt–oxido complex
Source: Royal Society of Chemistry journal article supplement (doi:10.1039/d4cc03014a), 2024-01-01
Supplement: d4cc03014a1.pdf [file d4cc03014a1.pdf]

Supplementary Information for:

**Synthesis of a Potassium Capped Terminal Cobalt-Oxido Complex**

Sophie W. Anferov,<sup>a†</sup> Alexandra Krupinski,<sup>a†</sup> John S. Anderson<sup>a\*</sup>

<sup>a</sup>Department of Chemistry, University of Chicago, Chicago, Illinois 60637, United States.

<sup>†</sup>These authors contributed equally

\*Corresponding author: [jsanderson@uchicago.edu](mailto:jsanderson@uchicago.edu)

## Table of Contents

|                                                                                                                                                                                                                                                         |    |
|---------------------------------------------------------------------------------------------------------------------------------------------------------------------------------------------------------------------------------------------------------|----|
| <i>General Methods</i> .....                                                                                                                                                                                                                            | 3  |
| <i>Synthesis of [<sup>t</sup>Bu,<sup>Tol</sup>DHP]CoOK (1)</i> .....                                                                                                                                                                                    | 3  |
| <i>Characterization of [<sup>t</sup>Bu,<sup>Tol</sup>DHP]Co(MeCN)</i> .....                                                                                                                                                                             | 3  |
| <i>Preparation of UV-Vis Samples</i> .....                                                                                                                                                                                                              | 4  |
| <i>Preparation of IR Samples of (1)</i> .....                                                                                                                                                                                                           | 4  |
| <i>Electrochemical Experiments</i> .....                                                                                                                                                                                                                | 4  |
| <i>Density Functional Theory (DFT) Geometry Optimizations</i> .....                                                                                                                                                                                     | 4  |
| <i>NMR Spectroscopy</i> .....                                                                                                                                                                                                                           | 5  |
| Figure S1. <sup>1</sup> H NMR of [ <sup>t</sup> Bu, <sup>Tol</sup> DHP]CoOK (1) in C <sub>6</sub> D <sub>6</sub> .....                                                                                                                                  | 5  |
| Figure S2. Comparison of <sup>1</sup> H NMR of [ <sup>t</sup> Bu, <sup>Tol</sup> DHP]CoOH in C <sub>6</sub> D <sub>6</sub> (top) to <sup>1</sup> H NMR of [ <sup>t</sup> Bu, <sup>Tol</sup> DHP]CoOK (1) in C <sub>6</sub> D <sub>6</sub> (bottom)..... | 6  |
| Figure S3. <sup>1</sup> H NMR of (CF <sub>3</sub> ) <sub>2</sub> CHOH (HFIP) in C <sub>6</sub> D <sub>6</sub> .....                                                                                                                                     | 6  |
| Figure S4. <sup>1</sup> H NMR of 2,4,6-tri-tert-butylphenol (2,4,6-TTBP) in C <sub>6</sub> D <sub>6</sub> .....                                                                                                                                         | 7  |
| Figure S6. <sup>1</sup> H NMR of Phenol in C <sub>6</sub> D <sub>6</sub> .....                                                                                                                                                                          | 8  |
| Figure S7. <sup>1</sup> H NMR of tert-butanol in C <sub>6</sub> D <sub>6</sub> .....                                                                                                                                                                    | 8  |
| Figure S8. Comparison of <sup>1</sup> H NMR of 1 + HFIP in C <sub>6</sub> D <sub>6</sub> (top) to 1 in C <sub>6</sub> D <sub>6</sub> (bottom).....                                                                                                      | 9  |
| Figure S9. Comparison of <sup>1</sup> H NMR of 1 + TFE in C <sub>6</sub> D <sub>6</sub> (top) to 1 in C <sub>6</sub> D <sub>6</sub> (bottom).....                                                                                                       | 9  |
| Figure S10. Comparison of <sup>1</sup> H NMR of 1 + Phenol in C <sub>6</sub> D <sub>6</sub> (top) to 1 in C <sub>6</sub> D <sub>6</sub> (bottom).....                                                                                                   | 10 |
| Figure S11. Comparison of <sup>1</sup> H NMR of 1 + 2,4,6-TTBP in C <sub>6</sub> D <sub>6</sub> (top) to 1 in C <sub>6</sub> D <sub>6</sub> (bottom).....                                                                                               | 10 |
| <i>UV-Vis Spectroscopy</i> .....                                                                                                                                                                                                                        | 12 |
| Figure S13. UV-vis of 1 from a 0.125 mM solution in toluene at room temperature.....                                                                                                                                                                    | 12 |
| <i>IR Spectroscopy</i> .....                                                                                                                                                                                                                            | 12 |
| Figure S14. IR of 1 as a thin film.....                                                                                                                                                                                                                 | 12 |
| Figure S15. IR comparing IR of 1 (purple) as a thin film to IR of [ <sup>t</sup> Bu, <sup>Tol</sup> DHP]CoOH (blue) as a thin film.....                                                                                                                 | 13 |
| <i>Cyclic Voltammetry</i> .....                                                                                                                                                                                                                         | 13 |
| Figure S16. Cyclic Voltammogram of 2.4 mM of 1 in 0.1M KPF <sub>6</sub> electrolyte in a 1:4 MeCN:THF solution. Scan window: 1.5V to -3.5 V.....                                                                                                        | 13 |
| Figure S17. Cyclic Voltammogram of 2.4 mM of 1 in 0.1M KPF <sub>6</sub> electrolyte in a 1:4 MeCN:THF solution. Scan window: 0 V to -2.5 V.....                                                                                                         | 14 |
| <i>Single Crystal X-ray Diffraction</i> .....                                                                                                                                                                                                           | 14 |
| Figure S18. SXRDR of 1. Co (pink), N (blue), C (gray), O (red), K(violet). C-H H-atoms omitted.....                                                                                                                                                     | 14 |
| Table S1. SXRDR of 1.....                                                                                                                                                                                                                               | 15 |
| Table S2. Selected bond lengths (Å) and angles (°) of 1 and related Co complexes.....                                                                                                                                                                   | 15 |
| Figure S19. SXRDR of [ <sup>t</sup> Bu, <sup>Tol</sup> DHP]Co(MeCN). Co (pink), N (blue), C (gray), C-H H-atoms omitted for clarity.....                                                                                                                | 16 |
| Table S3. SXRDR of [ <sup>t</sup> Bu, <sup>Tol</sup> DHP]Co(MeCN).....                                                                                                                                                                                  | 16 |
| <i>EPR Spectroscopy</i> .....                                                                                                                                                                                                                           | 17 |
| Figure S20. X-band EPR spectrum (black) and simulated spectrum (red) of a 15 mM solution of 1 (dimer) in toluene at 25 K. Conditions: MW frequency, 9.63 GHz; MW power, 2.0 mW.....                                                                     | 17 |
| Table S4. Simulated g-values for EPR of 1.....                                                                                                                                                                                                          | 17 |
| Code to generate simulations of EPR Spectra for 1.....                                                                                                                                                                                                  | 18 |
| Code to generate simulations of EPR Spectra for [ <sup>t</sup> Bu, <sup>Tol</sup> DHP]CoOH.....                                                                                                                                                         | 18 |
| <i>Density Functional Theory (DFT) Calculations</i> .....                                                                                                                                                                                               | 19 |
| Figure S22. Calculated structure of 1. All C-H hydrogen atoms have been removed for clarity.....                                                                                                                                                        | 19 |
| Figure S23. Spin density plot of 1 at an iso value of 0.005.....                                                                                                                                                                                        | 19 |
| Table S5. Single Point Energy Calculations of 1 with the addition of different acids.....                                                                                                                                                               | 20 |
| Figure S24. Calculated M-O bond lengths from monomeric (DHP)CoOM complexes (S = ½) where M is each alkali metal (going down column 1 of the periodic table, rows 1-7).....                                                                              | 20 |

|                                                                                                    |    |
|----------------------------------------------------------------------------------------------------|----|
| Table S6. Single Point Energy Calculations of <b>1</b> with different alkali metal cations .....   | 20 |
| <i>pK<sub>a</sub> Values of Weak Acids</i> .....                                                   | 20 |
| Table S7. <i>pK<sub>a</sub></i> values for acids used in <i>pK<sub>a</sub></i> bracket study ..... | 20 |
| <i>References</i> .....                                                                            | 21 |

## General Methods

All chemicals were purchased from commercial suppliers and used without further purification. All manipulations were carried out under an atmosphere of N<sub>2</sub> using standard Schlenk and glovebox techniques. Glassware was dried at 180 °C for a minimum of two hours and cooled under vacuum prior to use. Solvents were dried on a solvent purification system from Pure Process Technologies and stored over 4 Å molecular sieves under N<sub>2</sub>. Tetrahydrofuran (THF) was stirred over NaK alloy and run through an additional alumina column prior to use to ensure dryness. Solvents were tested for H<sub>2</sub>O and O<sub>2</sub> using a standard solution of sodium-benzophenone ketyl radical anion. CD<sub>3</sub>CN, C<sub>6</sub>D<sub>6</sub>, and *d*<sub>8</sub>-toluene were dried over 4 Å molecular sieves under N<sub>2</sub>. <sup>1</sup>H NMR spectra were recorded on Bruker DRX 400 or 500 spectrometers. Chemical shifts are reported in ppm units referenced to residual solvent resonances for <sup>1</sup>H NMR spectra. UV-visible spectra were recorded on a Bruker Evolution 300 spectrometer and analyzed using VisionPro software. A standard 1 cm quartz cuvette with an airtight screw cap with a puncturable Teflon seal was used for all measurements. A Unisoku CoolSpek cryostat was used for low temperature measurements. IR spectra were recorded on a Bruker Tensor II spectrometer with the OPUS software suite as DCM thin films between KBr plates. Single crystal X-ray diffraction data were collected in-house using Bruker D8 Venture diffractometer equipped with Mo microfocus X-ray tube ( $\lambda = 0.71073 \text{ \AA}$ ). Electrochemical measurements were carried out using a BAS Epsilon potentiostat and using BAS Epsilon software version 1.40.67 NT. EPR spectra were recorded on an Elexsys E500 spectrometer with an Oxford ESR 900 X-band cryostat and a Bruker Cold-Edge Stinger and were simulated using the Easyspin suite in Matlab software.<sup>1</sup> Magnetic moments were determined using the Evans method.<sup>2</sup>

### Synthesis of [<sup>*t*</sup>Bu,<sup>*Tol*</sup>DHP]CoOK (**1**)

In a 20 mL vial in the glovebox, 2 mL of toluene was added to [<sup>*t*</sup>Bu,<sup>*Tol*</sup>DHP]CoOH (0.002 g, 1 eq., 0.004 mmol).<sup>3</sup> A suspension of potassium tert-butoxide (0.0022 g, 5 eq., 0.020 mmol) in toluene was added to the bright purple solution of [<sup>*t*</sup>Bu,<sup>*Tol*</sup>DHP]CoOH. After stirring for 1-2 h, or until the suspended white solids were no longer visible, the resulting green-purple solution was dried *in vacuo* and extracted into benzene. Complex **1** can then be isolated as a purple solid after crystallizations in petroleum ether. Yield: 0.0019 g, 88 %. Poor quality single crystals suitable for XRD of **1** were grown out of a cooled concentrated petroleum ether solution at -35°C. <sup>1</sup>H NMR (400 MHz, C<sub>6</sub>D<sub>6</sub>, RT):  $\delta = 10.92$  (br s), 8.44 (s), 6.67 (s), 1.88(s), 1.50(s). Magnetic Susceptibility: Evans' Method for **1** (C<sub>7</sub>D<sub>8</sub> RT, 500 MHz,  $\mu_B$ ):  $\mu_{\text{eff}} = 3.62$ , UV-vis, nm in toluene, ( $\epsilon$ , M<sup>-1</sup>cm<sup>-1</sup>): 2213.32. HRMS (EI) *m/z*: [M]<sup>+</sup> calculated for **1**: C<sub>28</sub>H<sub>34</sub>N<sub>5</sub>OKCo 554.1732 found: 554.1775.

In practice, this compound can also be obtained from [<sup>*t*</sup>Bu,<sup>*Tol*</sup>DHP]CoCl or OTf via addition of wet KO<sup>*t*</sup>Bu.<sup>4</sup>

### Characterization of [<sup>*t*</sup>Bu,<sup>*Tol*</sup>DHP]Co(MeCN)

The [<sup>*t*</sup>Bu,<sup>*Tol*</sup>DHP]Co(MeCN) has been previously reported.<sup>5</sup> In this work we report its crystal structure.

### *Preparation of UV-Vis Samples*

An aliquot of complex **1** was dissolved in toluene in a quartz cuvette in the glove box. The 1 cm quartz cuvette was equipped with an airtight screw cap. The spectrum was collected under a blanketing flow of Nitrogen.

### *Preparation of IR Samples of (1)*

Separate samples of complex **1** and [<sup>t</sup>Bu, Tol]DHP]CoOH were dissolved in dry dichloromethane to form a concentrated solution. This was dropcast onto a KBr plate, and a second plate was then placed on top. The sample was then transferred in an air-free temporary container to the spectrometer, and a spectrum was collected.

### *Electrochemical Experiments*

Experiments were performed inside the glovebox with a 1:4 MeCN:THF 0.1 M KPF<sub>6</sub> electrolyte solution at room temperature. Cyclic voltammetry measurements were made with a [Co] = 2.4 mM using a glassy carbon working electrode, platinum wire counter electrode, and silver wire pseudo reference electrode and were referenced to internal Fc/Fc<sup>+</sup> by adding ferrocene at the end of measurements. A one-compartment glass cell was filled with 4 mL of electrolyte solution. The working electrode was polished over a microcloth pad (Buehler) using alumina slurry (0.05mm EMS), followed by rinsing with deionized water and isopropyl alcohol. Reference and counter electrodes were rinsed with acetone. CVs were recorded at a scan rate of 200 mV/s scanning oxidatively.

### *Density Functional Theory (DFT) Geometry Optimizations*

Geometry optimization calculations and single point energy calculations were performed with ORCA<sup>6</sup> software suite using density functional theory (DFT). Geometries were fully optimized starting from coordinates generated from finalized cifs of the compound crystal structures when possible. The O3LYP functional was used for geometry optimizations, spin density plot calculations, and single point energy calculations. For the O3LYP calculations, def2-TZVPP was used on Co, N, S, O, and F, and def2-TZVP on C and H atoms. A CPCM solvation model for benzene was used throughout. Due to the challenge of simulating the dimeric OK complex, the calculation energies here do not include entropic contributions.

## NMR Spectroscopy

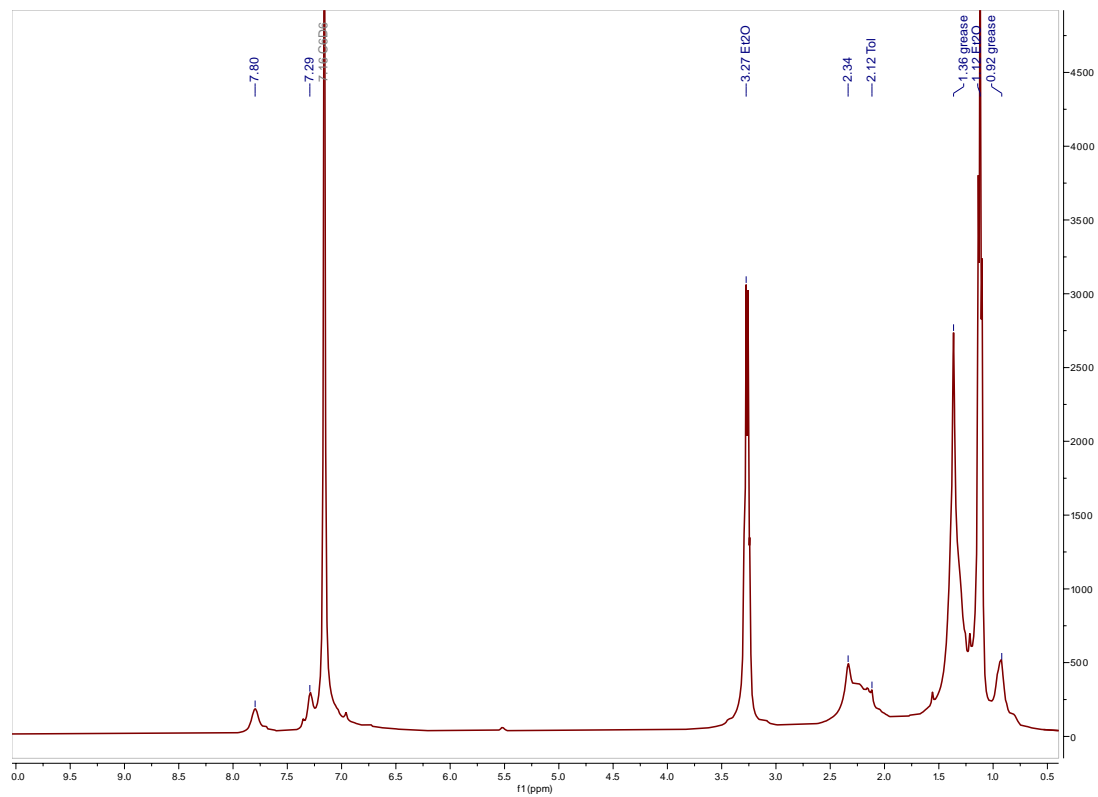

Figure S1.  $^1\text{H}$  NMR of  $[\text{tBu, Tol}]\text{DHP}]\text{CoOK}$  (1) in  $\text{C}_6\text{D}_6$ .

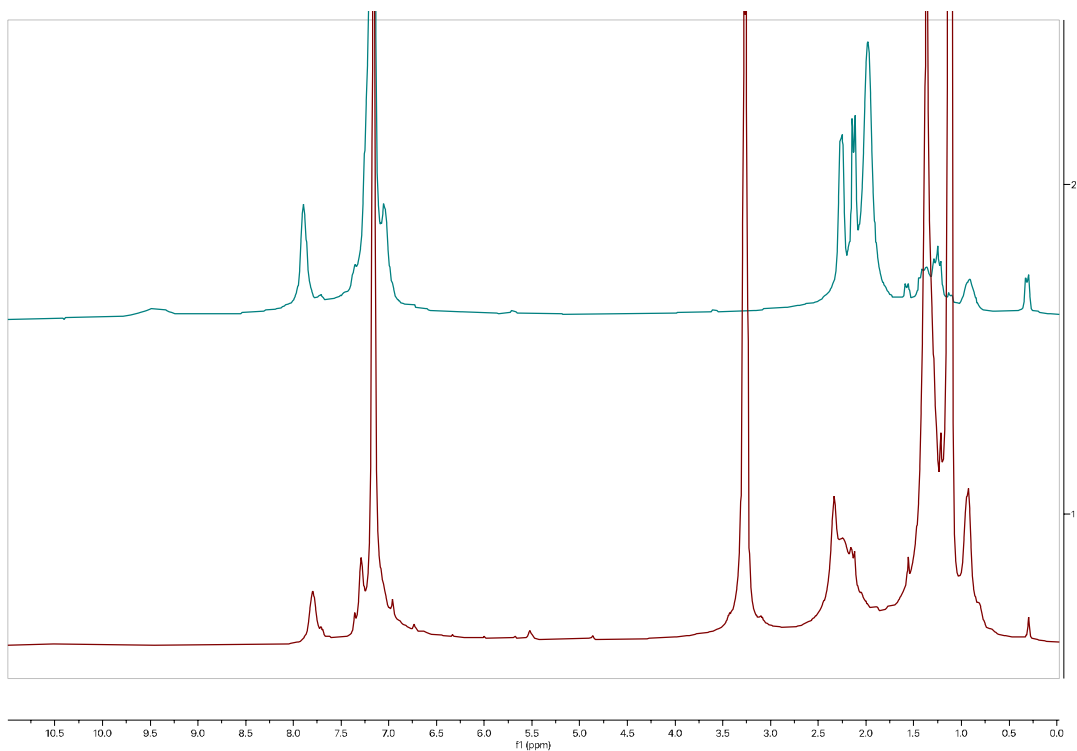

Figure S2. Comparison of  $^1\text{H}$  NMR of  $[\text{tBu, Tol}]\text{DHP}]\text{CoOH}$  in  $\text{C}_6\text{D}_6$  (top) to  $^1\text{H}$  NMR of  $[\text{tBu, Tol}]\text{DHP}]\text{CoOK}$  (**1**) in  $\text{C}_6\text{D}_6$  (bottom).

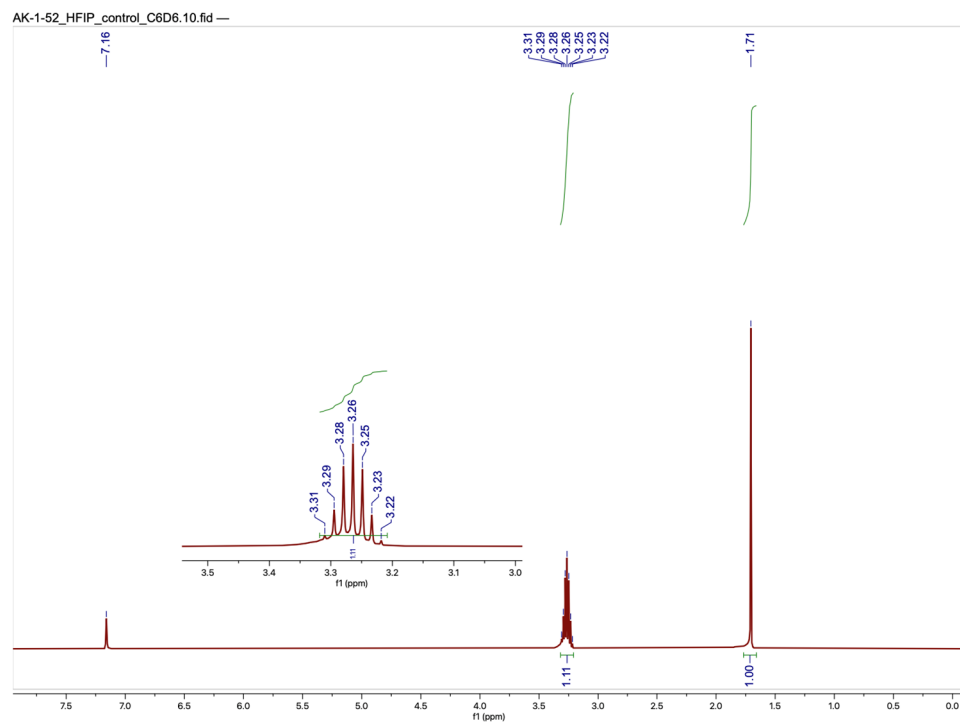

Figure S3.  $^1\text{H}$  NMR of  $(\text{CF}_3)_2\text{CHOH}$  (HFIP) in  $\text{C}_6\text{D}_6$ .

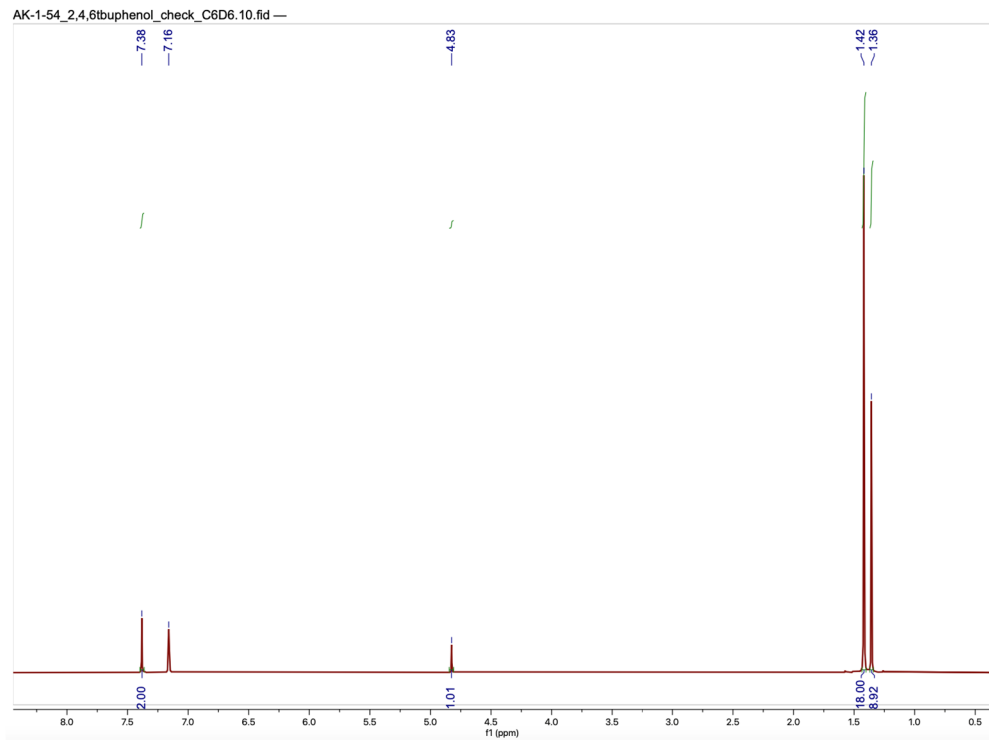

Figure S4.  $^1\text{H}$  NMR of 2,4,6-tri-tert-butylphenol (2,4,6-TTBP) in  $\text{C}_6\text{D}_6$ .

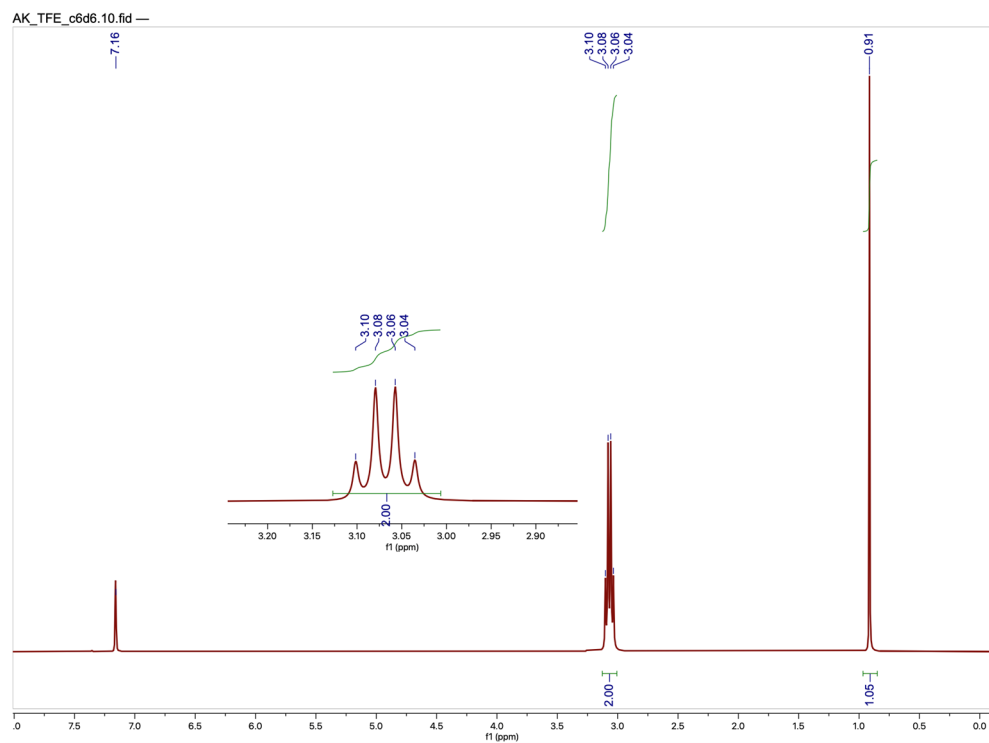

Figure S5.  $^1\text{H}$  NMR of 2,2,2-Trifluoroethanol (TFE) in  $\text{C}_6\text{D}_6$ .

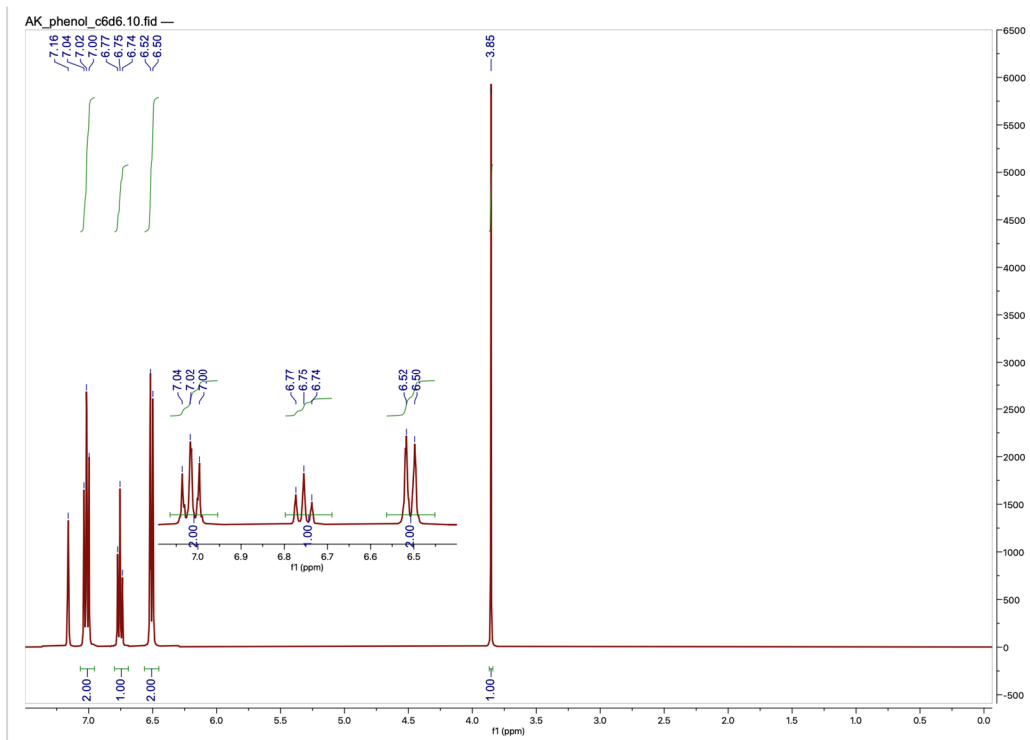

Figure S6.  $^1\text{H}$  NMR of Phenol in  $\text{C}_6\text{D}_6$ .

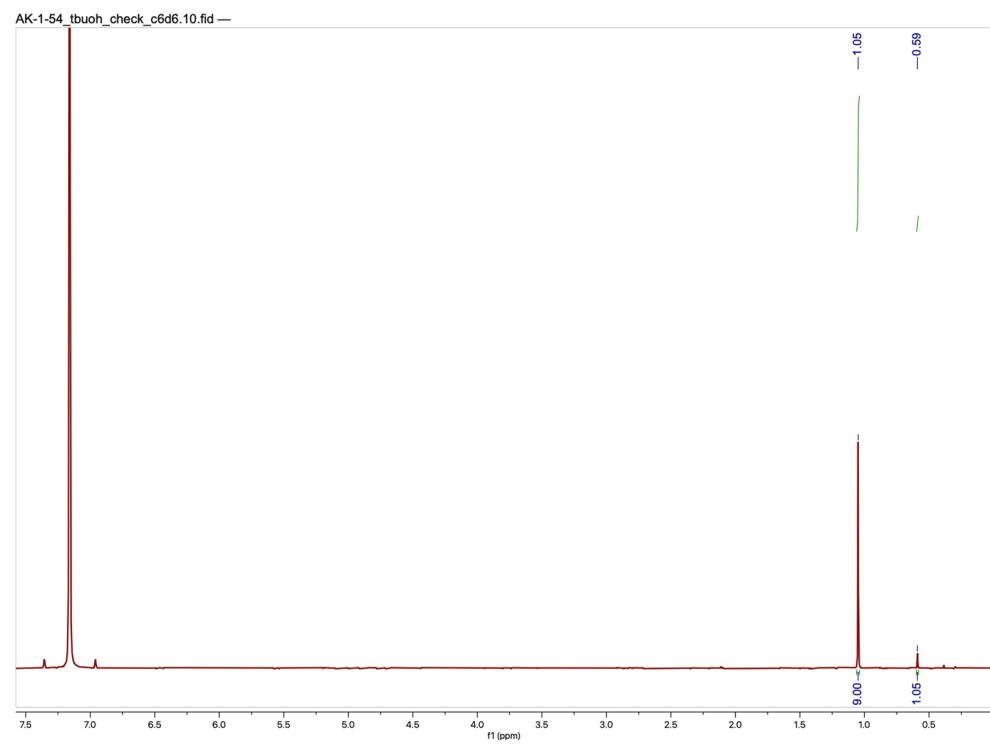

Figure S7.  $^1\text{H}$  NMR of tert-butanol in  $\text{C}_6\text{D}_6$ .



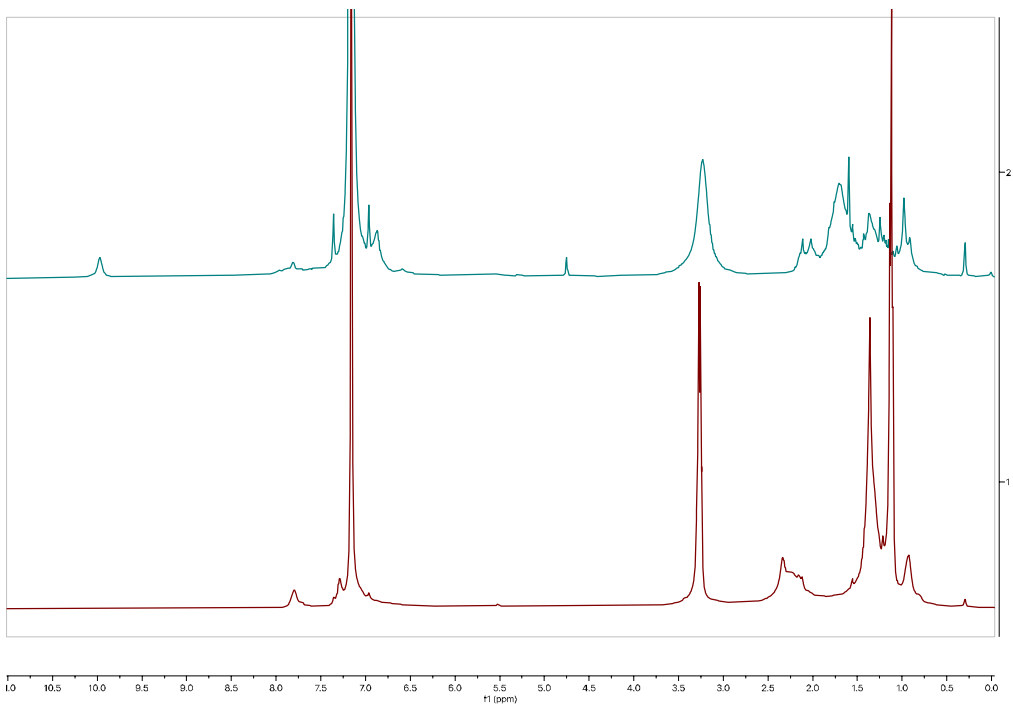

Figure S8. Comparison of <sup>1</sup>H NMR of **1** + HFIP in C<sub>6</sub>D<sub>6</sub> (top) to **1** in C<sub>6</sub>D<sub>6</sub> (bottom)

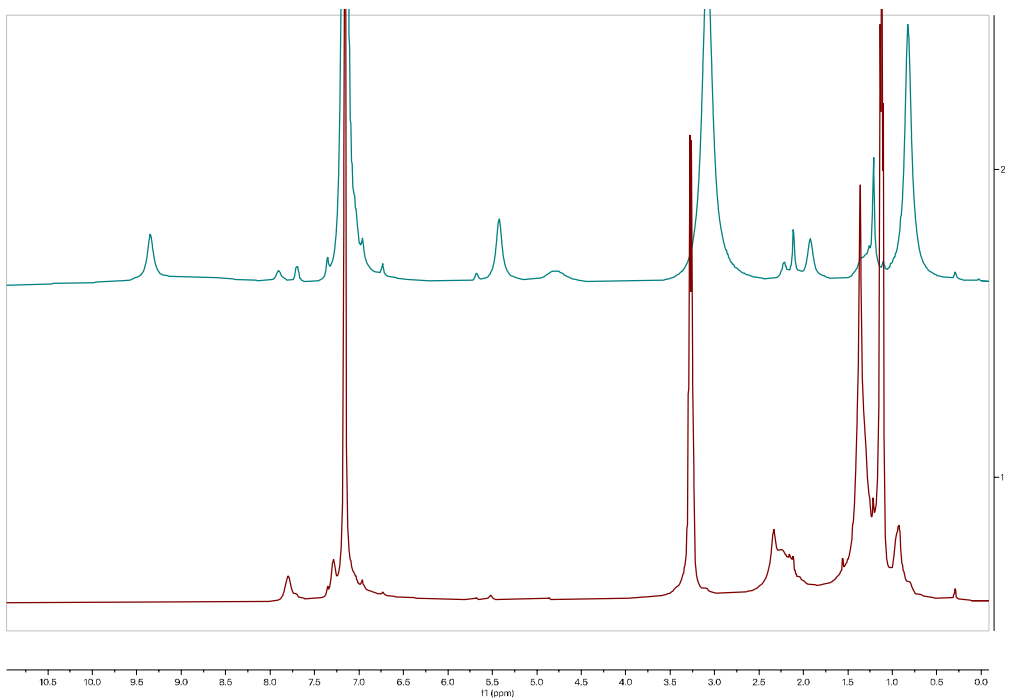

Figure S9. Comparison of <sup>1</sup>H NMR of **1** + TFE in C<sub>6</sub>D<sub>6</sub> (top) to **1** in C<sub>6</sub>D<sub>6</sub> (bottom)

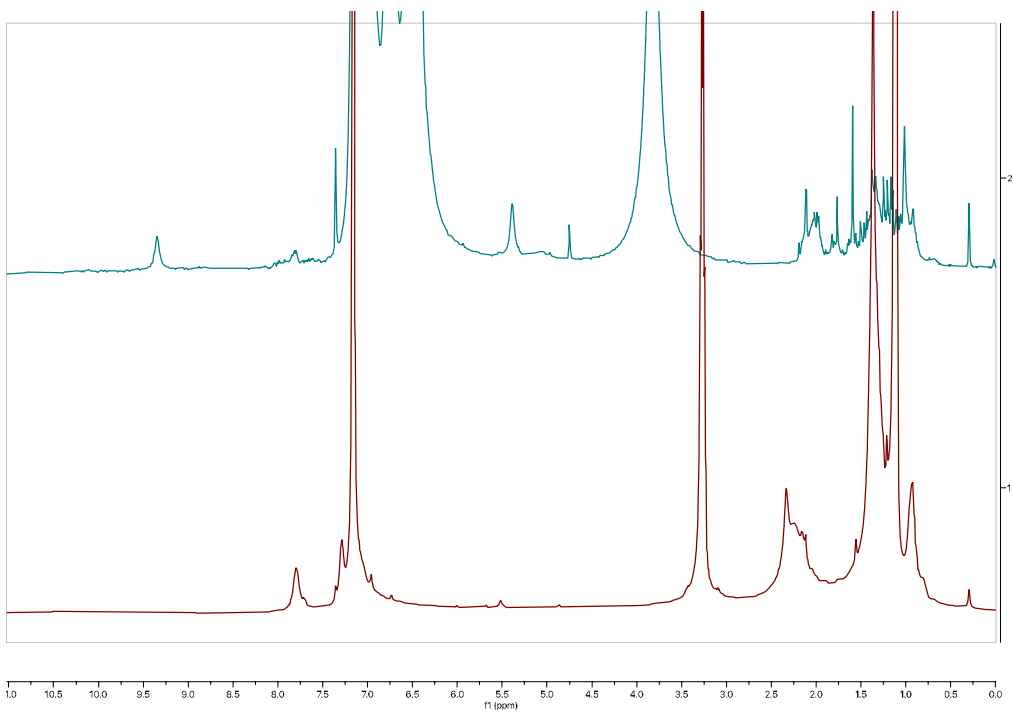

Figure S10. Comparison of <sup>1</sup>H NMR of **1** + Phenol in C<sub>6</sub>D<sub>6</sub> (top) to **1** in C<sub>6</sub>D<sub>6</sub> (bottom)

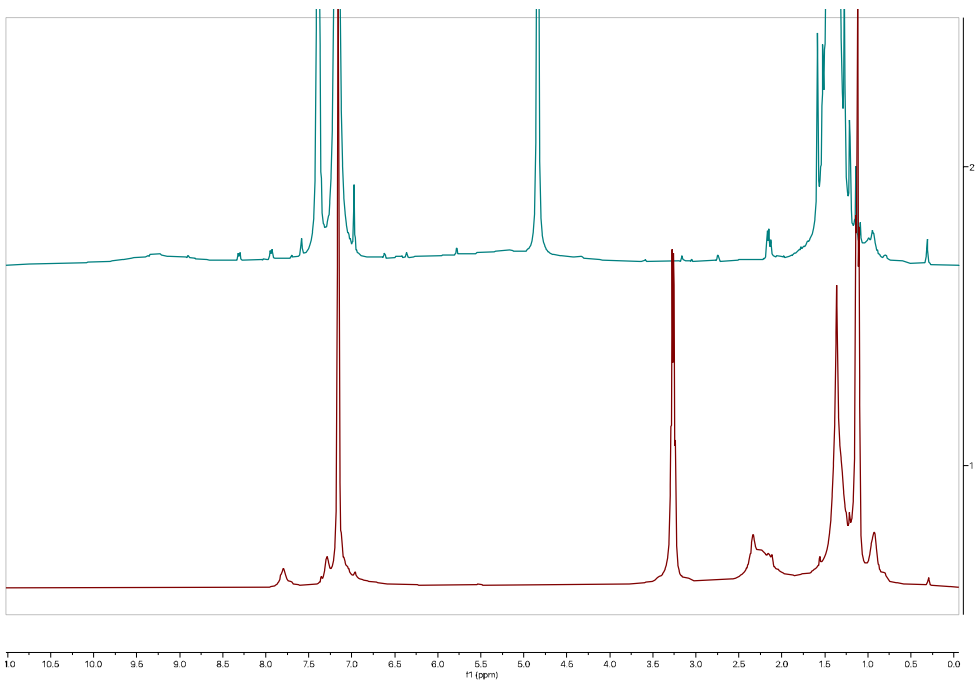

Figure S11. Comparison of <sup>1</sup>H NMR of **1** + 2,4,6-TTBP in C<sub>6</sub>D<sub>6</sub> (top) to **1** in C<sub>6</sub>D<sub>6</sub> (bottom)

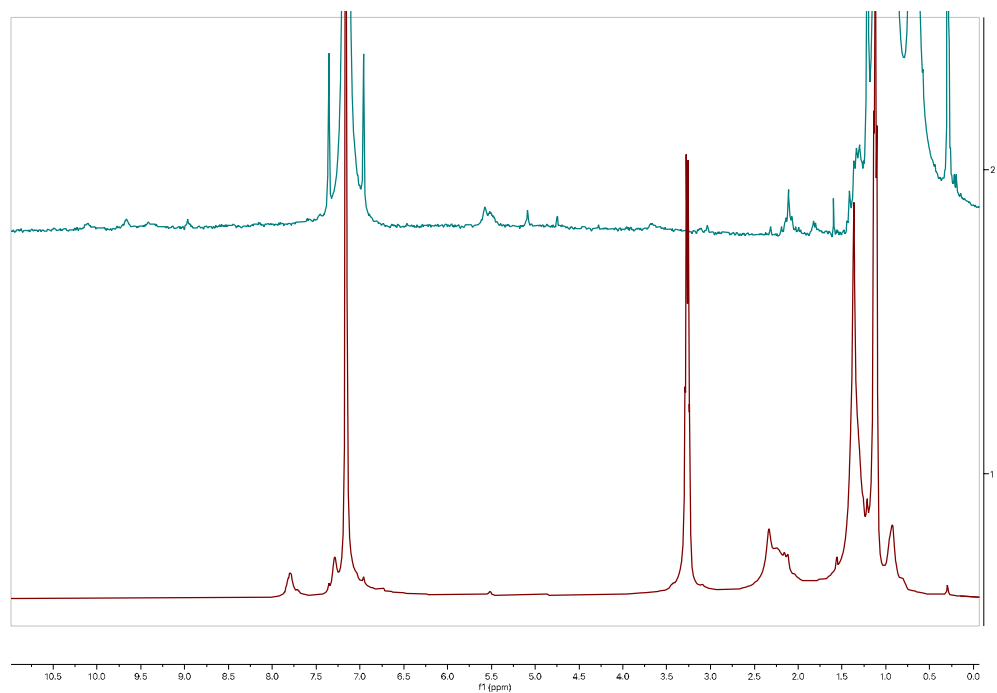

Figure S12. Comparison of <sup>1</sup>H NMR of **1** + tert-Butanol in C<sub>6</sub>D<sub>6</sub> (top) to **1** in C<sub>6</sub>D<sub>6</sub> (bottom)

### UV-Vis Spectroscopy

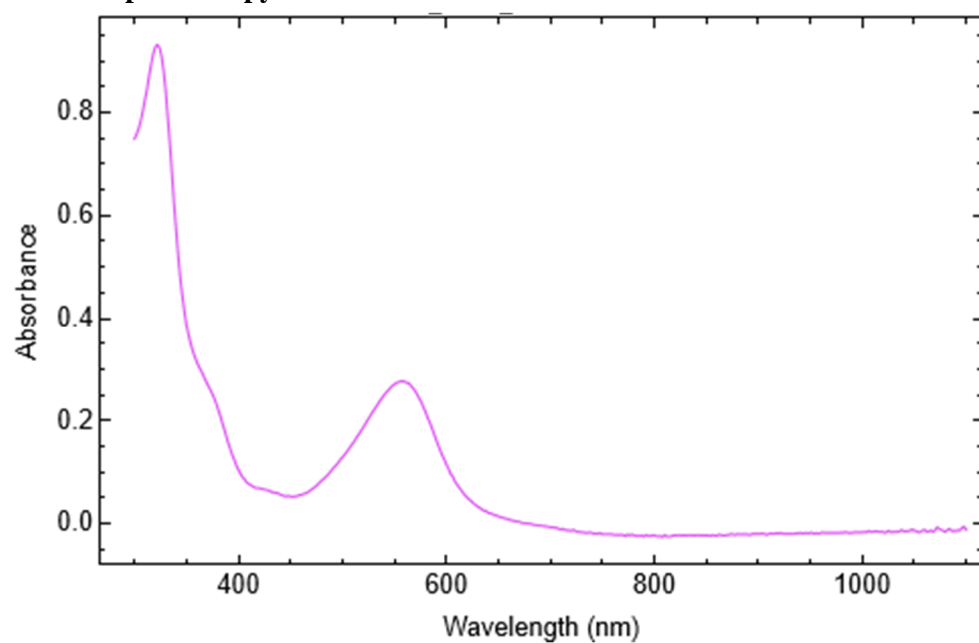

Figure S13. UV-vis of **1** from a 0.125 mM solution in toluene at room temperature.

### IR Spectroscopy

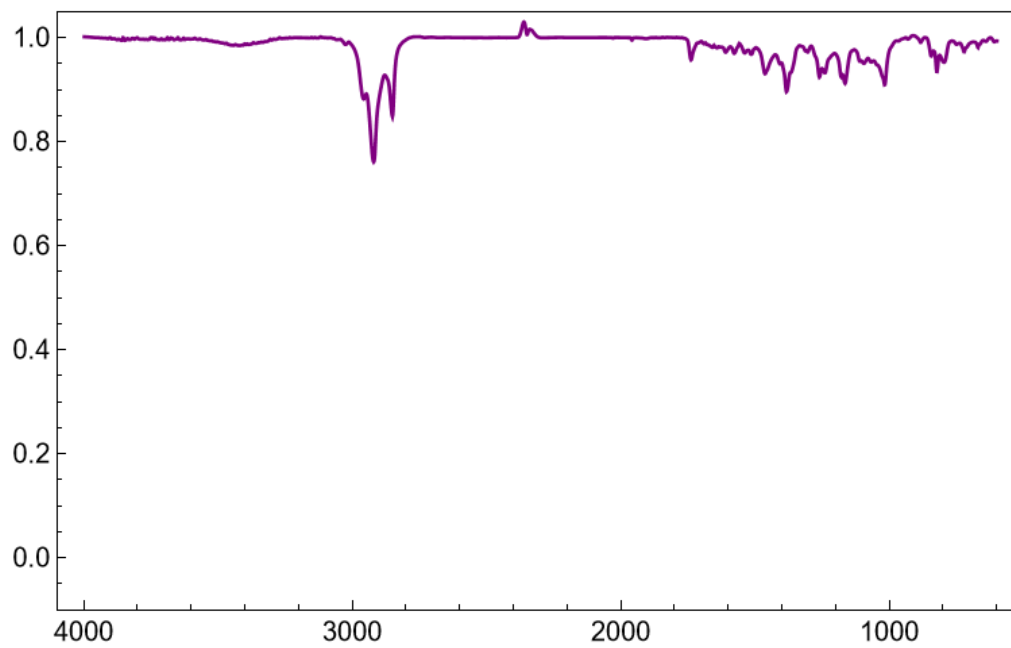

Figure S14. IR of **1** as a thin film.

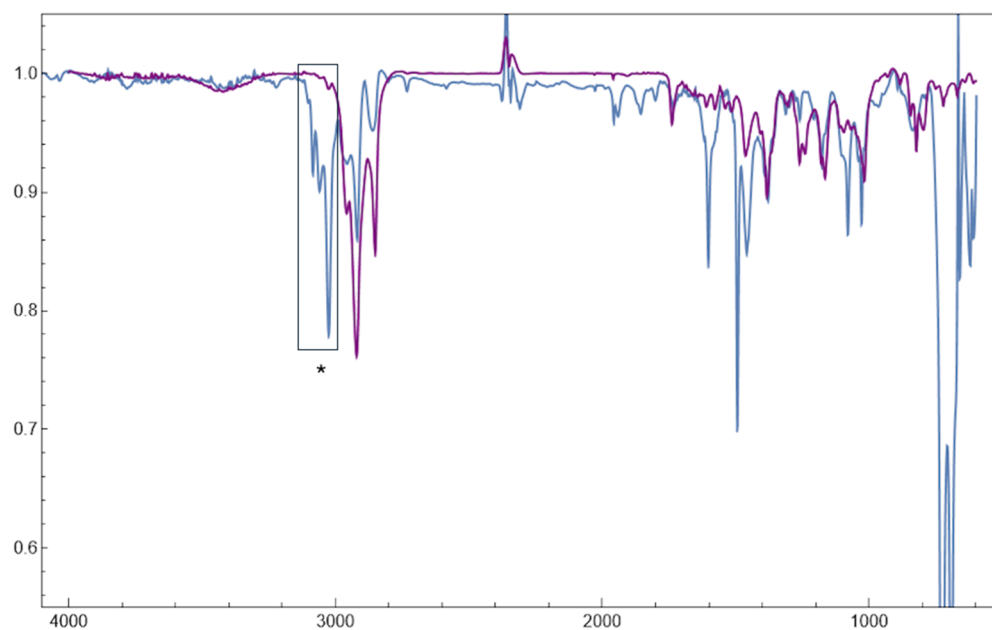

Figure S15. IR comparing IR of **1** (purple) as a thin film to IR of [<sup>t</sup>Bu, Tol]DHP]CoOH (blue) as a thin film. The OH peak of [tBu, Tol]DHP]CoOH is marked by an asterisk (\*) and is generally consistent DFT calculated values.<sup>3</sup> However, we note a few overlapping stretches, presumably from C–Hs. The low frequency of this OH made arise from hydrogen bonding interactions between molecules.

### Cyclic Voltammetry

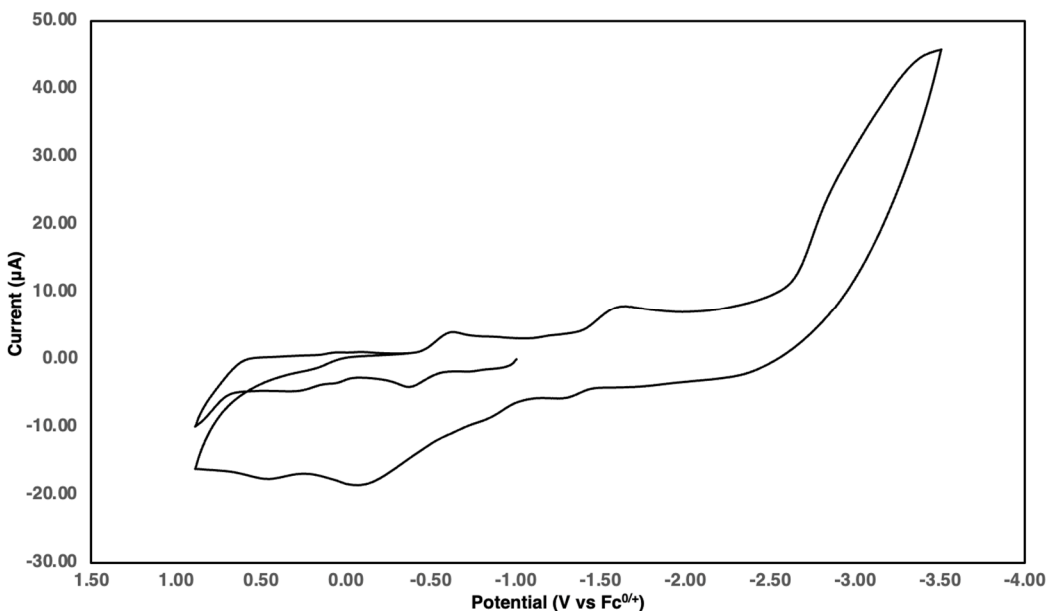

Figure S16. Cyclic Voltammogram of 2.4 mM of **1** in 0.1M KPF<sub>6</sub> electrolyte in a 1:4 MeCN:THF solution. Scan window: 1.5V to -3.5 V.

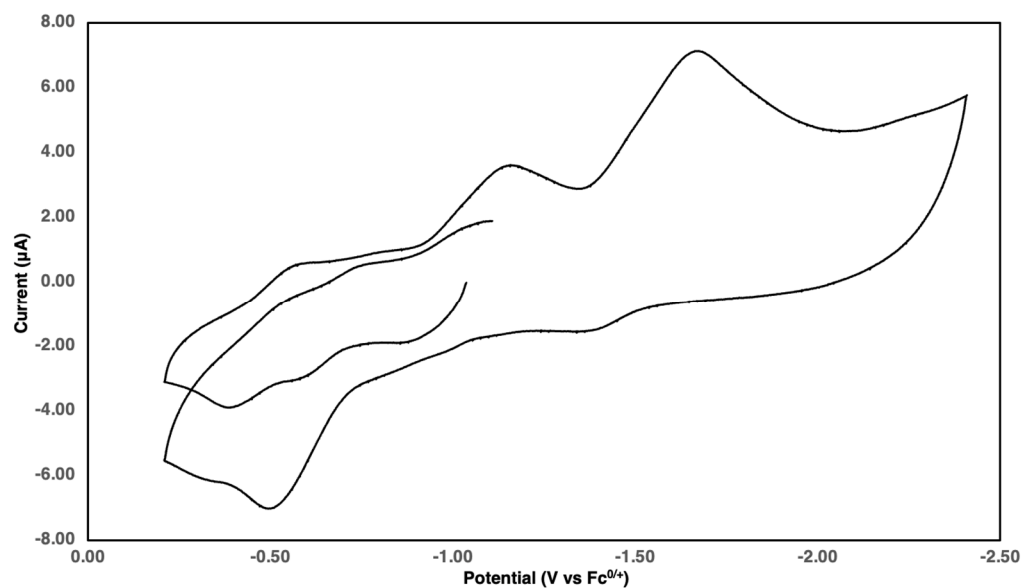

Figure S17. Cyclic Voltammogram of 2.4 mM of **1** in 0.1M KPF<sub>6</sub> electrolyte in a 1:4 MeCN:THF solution. Scan window: 0 V to -2.5 V

### Single Crystal X-ray Diffraction

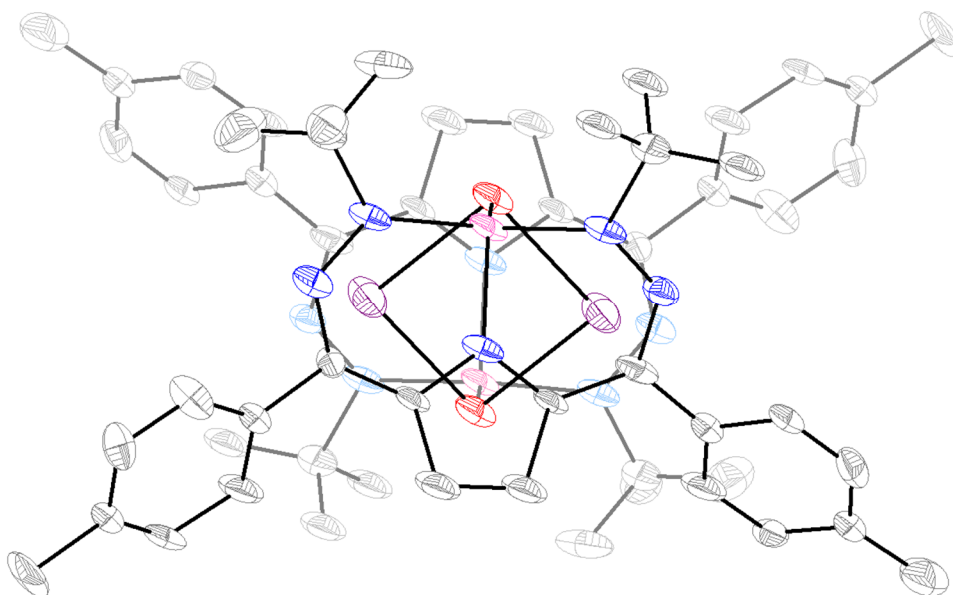

Figure S18. SXR D of **1**. Co (pink), N (blue), C (gray), O (red), K(violet). C-H H-atoms omitted.

Selected bond lengths (Å): Co-N1/N5: 1.94(1), 1.93(1); Co-N3: 1.94(1); N1-N2/N4-N5: 1.38(2), 1.32(2); Co-O: 1.96(1); N2-C5/N4-C10: 1.35(2), 1.33(2); C5-C6/C9-C10: 1.43(2), 1.41(2); C6-C7/C8-C9: 1.44(2), 1.42(2); C7-C8: 1.38(2). Selected bond angles (°): N1-M-N5: 149.4(6); N3-M-O: 107.4(5).

Table S1. SXRD of **1**.

|                                             |                                                               |
|---------------------------------------------|---------------------------------------------------------------|
| Empirical formula                           | C <sub>28</sub> H <sub>34</sub> CoKN <sub>5</sub> O           |
| Formula weight                              | 554.63                                                        |
| Temperature/K                               | 100(2)                                                        |
| Crystal system                              | triclinic                                                     |
| Space group                                 | P-1                                                           |
| a/Å                                         | 10.153(7)                                                     |
| b/Å                                         | 11.686(8)                                                     |
| c/Å                                         | 13.651(10)                                                    |
| α/°                                         | 89.533(19)                                                    |
| β/°                                         | 73.197(17)                                                    |
| γ/°                                         | 64.696(15)                                                    |
| Volume/Å <sup>3</sup>                       | 1389.1(17)                                                    |
| Z                                           | 2                                                             |
| ρ <sub>calc</sub> /cm <sup>3</sup>          | 1.326                                                         |
| μ/mm <sup>-1</sup>                          | 0.797                                                         |
| F(000)                                      | 582.0                                                         |
| Crystal size/mm <sup>3</sup>                | 0.242 × 0.072 × 0.052                                         |
| Radiation                                   | MoKα (λ = 0.71073)                                            |
| 2θ range for data collection/°              | 4.566 to 46.918                                               |
| Index ranges                                | -11 ≤ h ≤ 11, -12 ≤ k ≤ 13, -15 ≤ l ≤ 15                      |
| Reflections collected                       | 14083                                                         |
| Independent reflections                     | 4025 [R <sub>int</sub> = 0.2607, R <sub>sigma</sub> = 0.2678] |
| Data/restraints/parameters                  | 4025/216/261                                                  |
| Goodness-of-fit on F <sup>2</sup>           | 1.115                                                         |
| Final R indexes [I ≥ 2σ (I)]                | R <sub>1</sub> = 0.1435, wR <sub>2</sub> = 0.3264             |
| Final R indexes [all data]                  | R <sub>1</sub> = 0.2880, wR <sub>2</sub> = 0.4058             |
| Largest diff. peak/hole / e Å <sup>-3</sup> | 1.76/-0.99                                                    |

Table S2. Selected bond lengths (Å) and angles (°) of **1** and related Co complexes

|                   | DHPCoOK            | [DHP <sup>2-</sup> ]Co <sup>II</sup> (MeCN) <sub>2</sub> | [DHP <sup>1-</sup> ]CoOTf | [DHP <sup>2-</sup> ]Co <sup>III</sup> OH |
|-------------------|--------------------|----------------------------------------------------------|---------------------------|------------------------------------------|
| M—N1/M—N5         | 1.96(1)<br>1.92(1) | 1.936(3)<br>1.938(3)                                     | 1.999(8)<br>2.000(8)      | 1.897(3)<br>1.889(3)                     |
| M—N3              | 1.94(1)            | 1.938(3)                                                 | 1.918(7)                  | 1.861(3)                                 |
| N1—N2/ N4—<br>N5  | 1.38(2)<br>1.32(2) | 1.325(5)<br>1.320(5)                                     | 1.273(10)<br>1.249(10)    | 1.306(3)<br>1.302(3)                     |
| M—X(Cl/O/N)       | 1.96(1)            | 2.076(4)                                                 | 2.166<br>2.128(6)         | 1.825(2)                                 |
| N2—C5/ N4—<br>C10 | 1.35(2)<br>1.33(2) | 1.344(6)<br>1.339(6)                                     | 1.368(11)<br>1.383(11)    | 1.350(4)<br>1.342(4)                     |
| C5—C6/ C9—<br>C10 | 1.44(2)<br>1.42(2) | 1.402(6)<br>1.399(6)                                     | 1.387(13)<br>1.392(13)    | 1.390(4)<br>1.383(4)                     |

|              |          |            |           |          |
|--------------|----------|------------|-----------|----------|
| C6—C7/ C8—C9 | 1.44(2)  | 1.441(6)   | 1.428(13) | 1.439(4) |
|              | 1.41(2)  | 1.417(6)   | 1.445(13) | 1.438(4) |
| C7—C8        | 1.39(2)  | 1.351(6)   | 1.315(13) | 1.349(4) |
| N1—M—N5      | 149.1(5) | 160.51(12) | 178.1(3)  | 162.4(1) |
| N3—M—X       | 107.4(5) | 114.32(13) | 113.152   | 143.5(1) |
|              |          |            | 105.240   |          |

L = PMe<sub>3</sub> as described in the text.

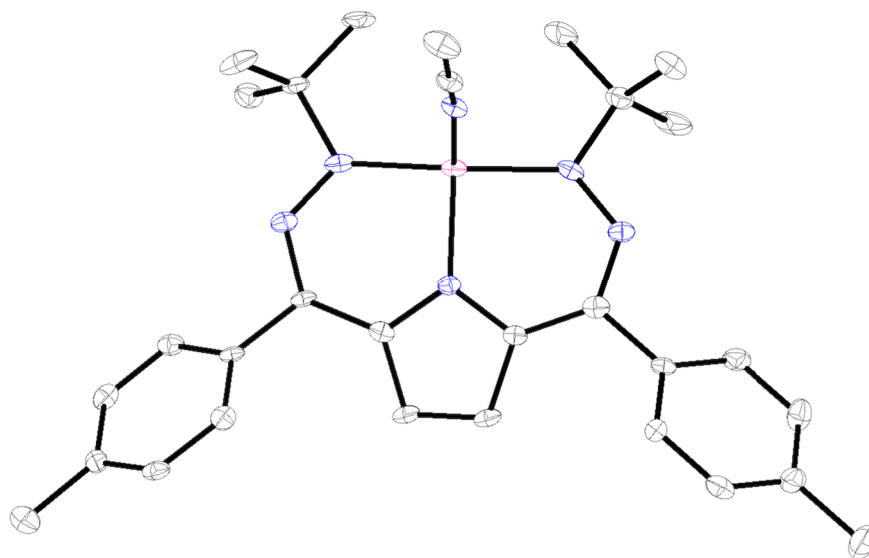

Figure S19. SXR of [<sup>tBu,Tol</sup>DHP]Co(MeCN) . Co (pink), N (blue), C (gray), C–H H-atoms omitted for clarity.

Table S3. SXR of [<sup>tBu,Tol</sup>DHP]Co(MeCN)

|                                    |                                                  |
|------------------------------------|--------------------------------------------------|
| Empirical formula                  | C <sub>30</sub> H <sub>37</sub> CoN <sub>6</sub> |
| Formula weight                     | 540.58                                           |
| Temperature/K                      | 100(2)                                           |
| Crystal system                     | orthorhombic                                     |
| Space group                        | P2 <sub>1</sub> 2 <sub>1</sub> 2 <sub>1</sub>    |
| a/Å                                | 8.9652(6)                                        |
| b/Å                                | 11.2879(7)                                       |
| c/Å                                | 27.8086(17)                                      |
| α/°                                | 90                                               |
| β/°                                | 90                                               |
| γ/°                                | 90                                               |
| Volume/Å <sup>3</sup>              | 2814.2(3)                                        |
| Z                                  | 4                                                |
| ρ <sub>calc</sub> /cm <sup>3</sup> | 1.276                                            |
| μ/mm <sup>-1</sup>                 | 0.639                                            |



|                                                |                                                                        |
|------------------------------------------------|------------------------------------------------------------------------|
| F(000)                                         | 1144.0                                                                 |
| Crystal size/mm <sup>3</sup>                   | 0.297 × 0.122 × 0.059                                                  |
| Radiation                                      | MoK $\alpha$ ( $\lambda = 0.71073$ )                                   |
| 2 $\Theta$ range for data collection/ $^\circ$ | 4.648 to 50.264                                                        |
| Index ranges                                   | -10 $\leq$ h $\leq$ 10, -13 $\leq$ k $\leq$ 13, -33 $\leq$ l $\leq$ 33 |
| Reflections collected                          | 54762                                                                  |
| Independent reflections                        | 5025 [ $R_{\text{int}} = 0.1142$ , $R_{\text{sigma}} = 0.0647$ ]       |
| Data/restraints/parameters                     | 5025/0/337                                                             |
| Goodness-of-fit on $F^2$                       | 1.061                                                                  |
| Final R indexes [ $I > 2\sigma(I)$ ]           | $R_1 = 0.0459$ , $wR_2 = 0.0727$                                       |
| Final R indexes [all data]                     | $R_1 = 0.0709$ , $wR_2 = 0.0791$                                       |
| Largest diff. peak/hole / e $\text{\AA}^{-3}$  | 0.38/-0.36                                                             |

### EPR Spectroscopy

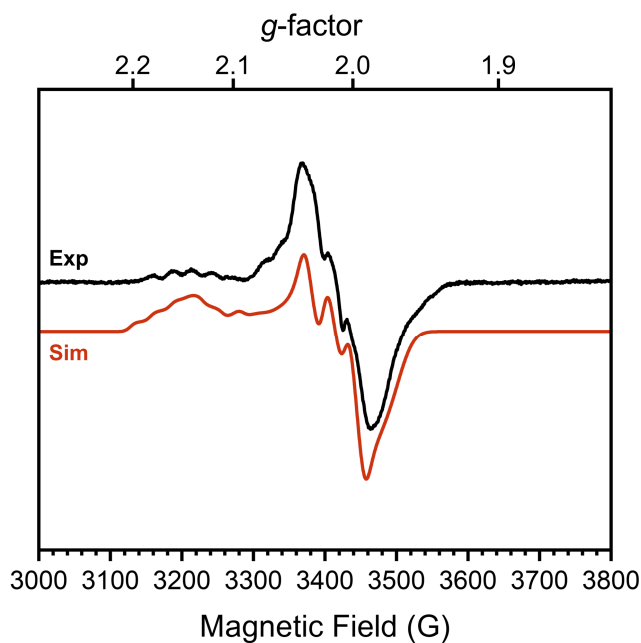

Figure S20. X-band EPR spectrum (black) and simulated spectrum (red) of a 15 mM solution of **1** (dimer) in toluene at 25 K. Conditions: MW frequency, 9.63 GHz; MW power, 2.0 mW.

Table S4. Simulated  $g$ -values for EPR of **1**

|                        | $g(x,y,z)$              | Co-A                     | N-A                          | H-strain                 |
|------------------------|-------------------------|--------------------------|------------------------------|--------------------------|
| <sup>t</sup> BuDHPCoOK | (2.14553 2.015 1.98313) | (37.85 7.0606<br>22.664) | (85.3902 87.9404<br>22.6612) | (41.7975<br>32.2248 100) |

Code to generate simulations of EPR Spectra for 1.

```

Exp1.mwFreq=9.63;
Sys1.lw = 1
Exp1.Range = [300 380]
Exp1.nPoints = 2048
Sys1.g = [2.14553 2.015 1.98313]
Sys1.Nucs = 'Co,N';
Sys1.A = [37.85 7.0606 22.664;85.3902 87.9404 22.6612];
Sys1.HStrain = [41.7975 32.2248 100];
Vary1.g = [0.02 0.02 0.02];
Vary1.HStrain = [20 1.5 50];
Vary1.A = [10 10 10; 10 10 10];
plot(Bk,(((Ik)/max(Ik))*0.225)*2,Bk,pepper(Sys1,Exp1)/(max(pepper(Sys1,Exp1))))
)

```

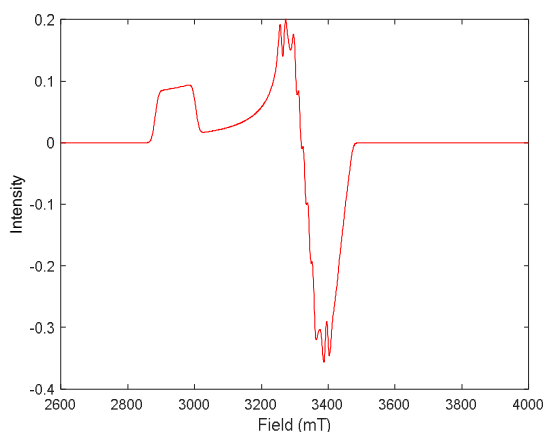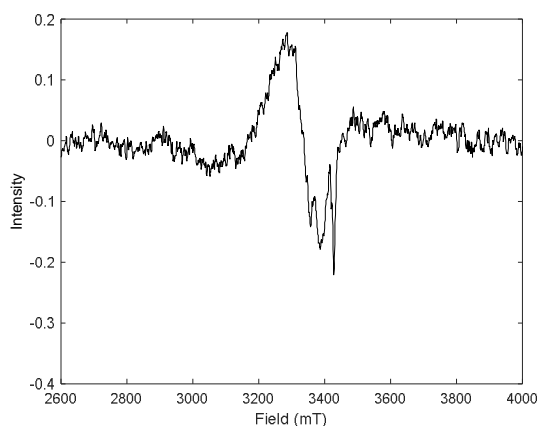

Figure S21. Small Window perpendicular-mode EPR spectrum (right) and simulated spectrum (left) of a 15 mM solution of [<sup>t</sup>Bu,<sup>Tol</sup>DHP]CoOH in toluene at 25 K. Conditions: MW frequency, 9.63 GHz; MW power, 2.0 mW.

Code to generate simulations of EPR Spectra for [<sup>t</sup>Bu,<sup>Tol</sup>DHP]CoOH.

```

Exp3.mwFreq=9.63913;
Sys3.lw = 1
Exp3.Range = [260 400]
Exp3.nPoints = 2048;
Sys3.g = [2.34 2.068 2.03];
Sys3.Nucs = 'Co, N';
Sys3.A = [50 40 40; 20 60 50];
Sys3.HStrain = [50 10 50];
Vary3.g = [0.02 0.02 0.02];
Vary3.HStrain = [50 10 50];
Vary3.A = [10 10 10; 10 10 10];
plot(BOH,((IOH)/max(IOH))-(-
0.000086*BOH+1.1044),BOH,0.2*pepper(Sys3,Exp3)/max(pepper(Sys3,Exp3)))

```

## Density Functional Theory (DFT) Calculations

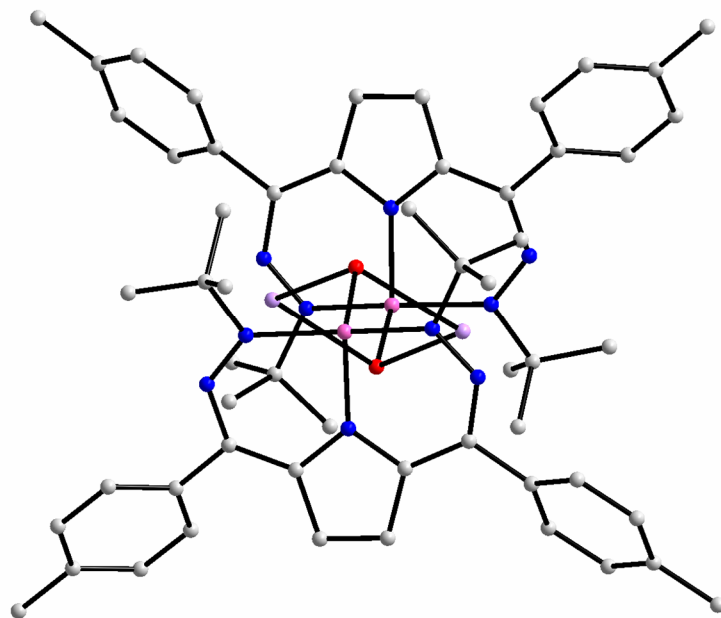

Figure S22. Calculated structure of **1**. All C–H hydrogen atoms have been removed for clarity

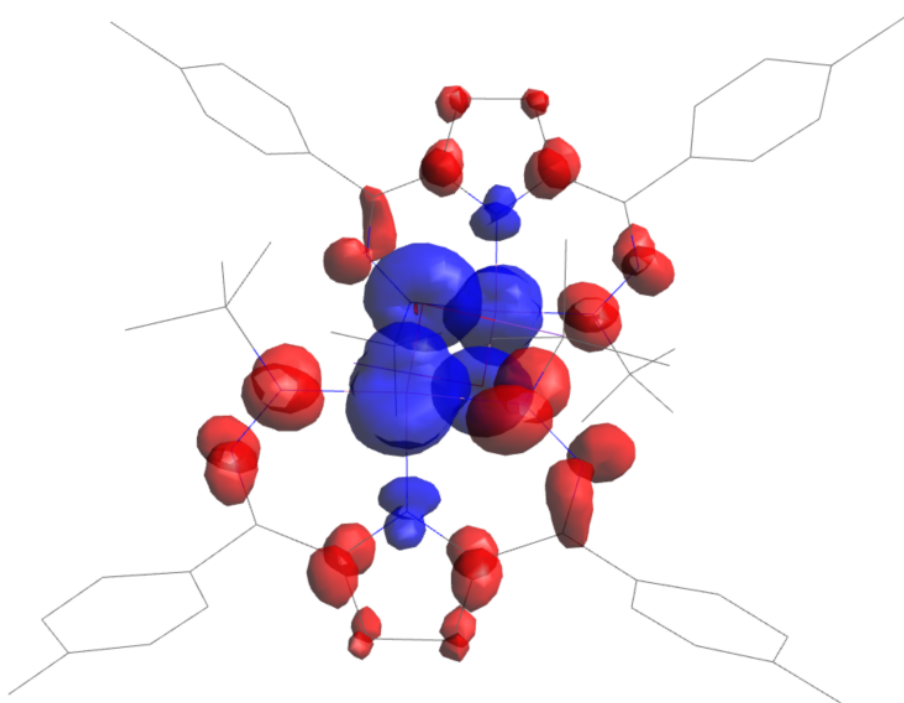

Figure S23. Spin density plot of **1** at an iso value of 0.005.

Table S5. Single Point Energy Calculations of **1** with the addition of different acids

| Dimer        |                           | LCoOK+<br>tbuOH | LCoOK+<br>CyOH | LCoOK+<br>IPA | LCoOK+<br>acetamide | LCoOK+<br>TFE | LCoOK+<br>Phenol | LCoOK+<br>2,4,6-TTBP | LCoOK+<br>PhenSL | LCoOK+<br>phthalamide | LCoOK+<br>HFIP | LCoOK+<br>BzCOOH | LCoOK dimer                                         |
|--------------|---------------------------|-----------------|----------------|---------------|---------------------|---------------|------------------|----------------------|------------------|-----------------------|----------------|------------------|-----------------------------------------------------|
| Kcal/<br>mol | From<br>LCoOH+<br>K[acid] | -18.01          | -17.82         | -17.19        | -7.13               | -6.05         | -2.98            | -2.63                | -1.62            | -0.80                 | 1.77           | 12.48            | -14.75                                              |
| Monomer      |                           | LCoOK+<br>tbuOH | LCoOK+<br>CyOH | LCoOK+<br>IPA | LCoOK+<br>acetamide | LCoOK+<br>TFE | LCoOK+<br>Phenol | LCoOK+<br>2,4,6-TTBP | LCoOK+<br>PhenSL | LCoOK+<br>phthalamide | LCoOK+<br>HFIP | LCoOK+<br>BzCOOH | All single<br>point<br>calculations<br>(no entropy) |
| Kcal/<br>mol |                           | -3.26           | -3.07          | -2.44         | 7.63                | 8.71          | 11.77            | 12.12                | 13.14            | 13.96                 | 16.52          | 27.23            |                                                     |

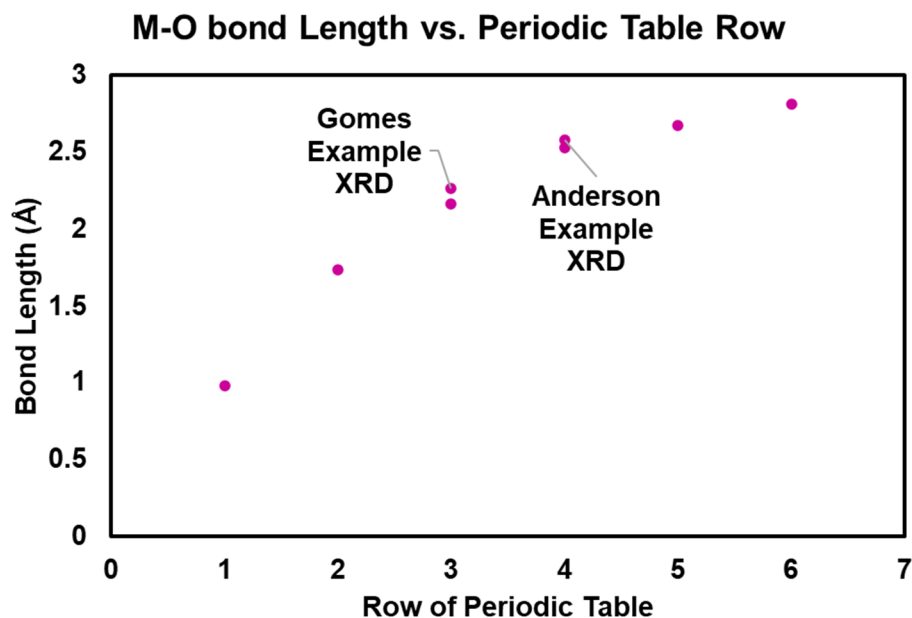

Figure S24. Calculated M–O bond lengths from monomeric (DHP)CoOM complexes ( $S = \frac{1}{2}$ ) where M is each alkali metal (going down column 1 of the periodic table, rows 1-7).

Table S6. Single Point Energy Calculations of **1** with different alkali metal cations

| Bond lengths in Å | LCoOH | LCoOLi | LCoONa | LCoOK | LCoORb | LCoOCs | LCoOK SXRD | Gomes SXRD | hydroxide |
|-------------------|-------|--------|--------|-------|--------|--------|------------|------------|-----------|
| single O-M bond   | 0.976 | 1.738  | 2.164  | 2.53  | 2.675  | 2.808  | 2.58       | 2.263      | --        |

### pK<sub>a</sub> Values of Weak Acids

Table S7. pK<sub>a</sub> values for acids used in pK<sub>a</sub> bracket study

| pK <sub>a</sub> | tbuOH              | 2,4,6-TTBP         | TFE                        | Phenol             | HFIP               |
|-----------------|--------------------|--------------------|----------------------------|--------------------|--------------------|
| Water           | 16.84 <sup>7</sup> | 12.19 <sup>8</sup> | 12.4 <sup>9</sup>          | 10.0 <sup>10</sup> | 9.3 <sup>11</sup>  |
| DMSO            | 29.4 <sup>13</sup> | --                 | 23.6 <sup>9</sup>          | 18.0 <sup>9</sup>  | 18.2 <sup>15</sup> |
| MeCN            | --                 | --                 | 35.8 (calc.) <sup>14</sup> | 29.2 <sup>12</sup> | --                 |

## References

1. S. Stoll and A. Schweiger, *J. Magn. Reson.*, 2006, **178**, 42–55.
2. D.F. Evans, *J. Chem. Soc.*, 1959, **0**, 2003-2005.
3. S.W. Anferov and J.S. Anderson, *J. Coord. Chem.*, 2022, **75**, 1853-1864.
4. S.W. Anferov, A.S. Filatov and J.S. Anderson, *ACS Catal.*, 2022, **12**, 9933-9943.
5. S.W. Anferov, J. Boyn, D.A. Mazziotti, J.S. Anderson, *J. Am. Chem. Soc.*, 2024, **146**, 5855-5863.
6. (a) F. Neese, *Wiley Interdis. Rev.: Comp. Mol. Sci.*, 2012, **2**, 73-78. (b) H - Kr: A. Schaefer, H. Horn and R. Ahlrichs, *J. Chem. Phys.*, 1992, **97**, 2571. (c) Rb - Xe: A.Schaefer, C. Huber and R. Ahlrichs, *J. Chem. Phys.*, 1994, **100**, 5829. (d) F. Weigend and R. Ahlrichs, *Phys. Chem. Chem. Phys.* 2005, **7**, 3297
7. A.S. Tracey, B. Galeffi and S. Mahjour, *Can. J. Chem.*, 1988, **66**, 2294 – 2298.
8. E. P. Serjeant and B. Dempsey, *Ionization Constants of Organic Acids in Solution*, IUPAC Chemical Data Series No. 23, 1979.
9. F.G. Bordwell, *Acc. Chem. Res.*, 1988, **21**, 456-463
10. M. Walton-Raaby, T. Floen, G. García-Díez, and N. Mora-Diez, *Antioxidants*, 2023, **12**, 1420.
11. B.L. Dyatkin, E.P. Mochalina, and I.L. Knunyants, *Tetrahedron*, 1965, **21**, 2991-2995.
12. A. Kütt, S. Tshepelevitsh, J. Saame, M. Lõkov, I. Kaljurand, S. Selberg, and I. Leito, *Eur. J. Org. Chem.*, 2021, **2021**, 1305–1473
13. W.N. Olmstead, Z. Margolin and F.G. Bordwell, *J. Org. Chem.*, 1980, **45**, 3295-3299.
14. Y.C. Lam, R.J. Nielsen, H.B. Gray and W.A. Goddard, *ACS Catal.*, 2015, **5**, 2521-2528.
15. D. Seebach, A.K. Beck, H. Bichsel, A. Pichota, C. Sparr, R. Wünsch and W.B. Schweizer, *Helv. Chim. Acta*, 2012, **95**, 1303-1322.
